# Supplementary material for: Genome wide identification and comparative analysis of glutathione transferases (GST) family genes in Brassica napus
Source: PubMed Central journal article supplement (PMC6591421; doi:10.1038/s41598-019-45744-5), 2019-06-24
Supplement: 41598_2019_45744_MOESM2_ESM.pdf [file 41598_2019_45744_MOESM2_ESM.pdf]

Genome wide identification and comparative analysis of glutathione transferases (GST) family genes in *Brassica napus*

Lijuan Wei<sup>1,2,†</sup>, Yan Zhu<sup>1,2,†</sup>, Ruiying Liu<sup>1,2,†</sup>, Aoxiang Zhang<sup>1,2</sup>, Meicheng Zhu<sup>1,2</sup>, Wen Xu<sup>1,2</sup>, Ai Lin<sup>1,2</sup>, Kun Lu<sup>1,2</sup>, Jiana Li<sup>1,2,\*</sup>

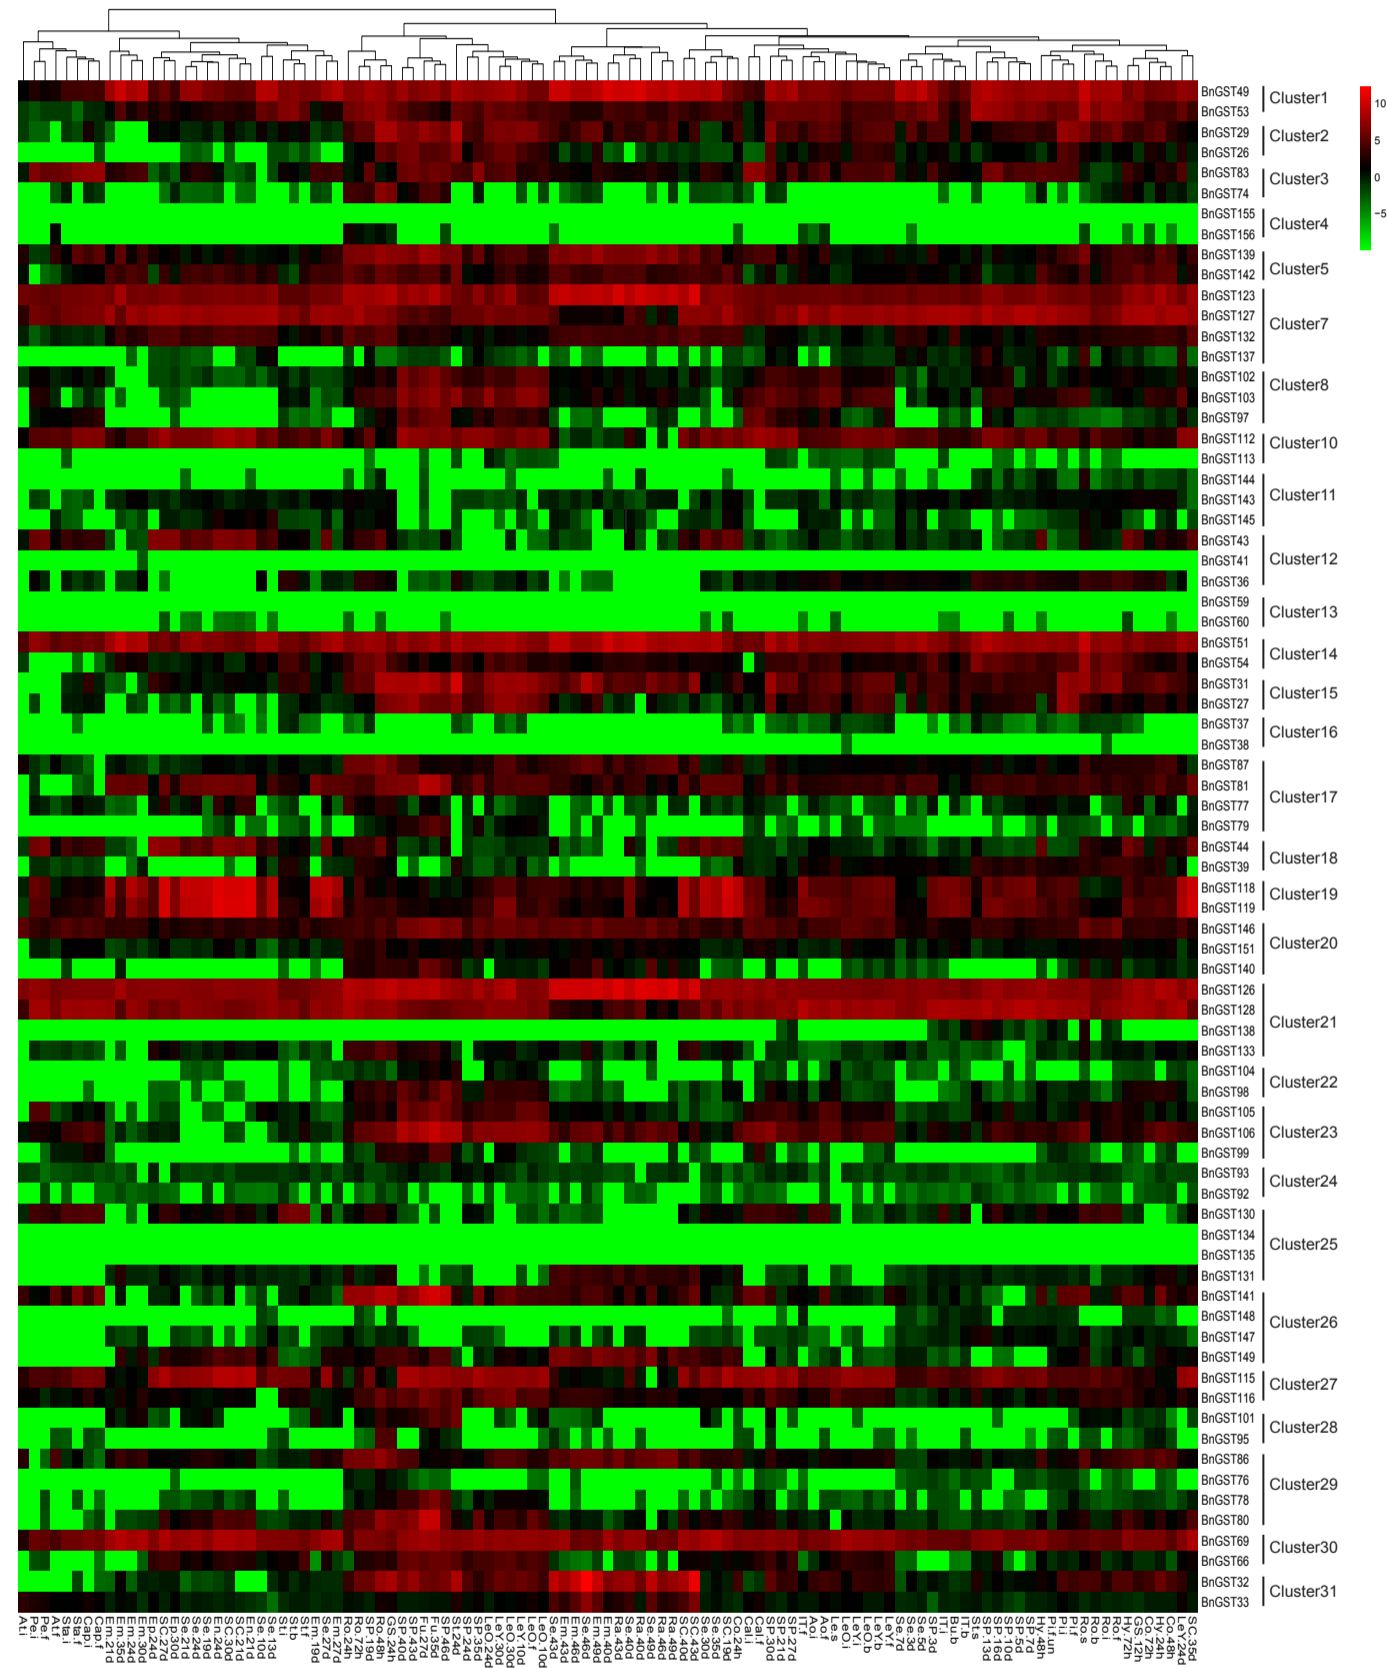

Supplementary Figure 2 Expression patterns of *BnGST* clusters in 21 different tissues at different developmental stages in *B. napus*.
